# Supplementary material for: Mechanical Regulation of Redox Balance via the Induction of the PIN1/NRF2/ARE Axis in Pancreatic Cancer
Source: MDPI journal article supplement (doi:10.3390/ijms24043476), 2023-02-09
Supplement: s1 [file s1]

Supplementary Table S1: The sequences of primers for qRT-PCR

|               | Sequence (5'-3')         |
|---------------|--------------------------|
| PIN1 Forward  | GAGAAGATCACCCGGACCAAGGAG |
| PIN1 Reverse  | GAGAAGATCACCCGGACCAAGGAG |
| HMOX forward  | AAGACTGCGTTCCTGCTCAAC    |
| HMOX reverse  | AAAGCCCTACAGCAACTGTCG    |
| GCLC Forward  | GTGGTACTGCTCACCAGAGTG    |
| GCLC Reverse  | AGCTCCGTGCTGTTCTGGGCCTT  |
| GCLM Forward  | ATCTTGCCTCCTGCTGTGTGATGC |
| GCLM Reverse  | CAATGACCGAATACCGCAGTAGCC |
| ME1 Forward   | CCTCACTACTGCTGAGGTTATAGC |
| ME1 Reverse   | CGGTTCAGGATAAACTGTGGCTG  |
| NQO1 Forward  | CGGAGTAAGAAGGCAGTGCTTTC  |
| NQO1 Reverse  | TCTGCTGGAGTGTGCCCAATGCT  |
| GAPDH forward | GGAGCGAGATCCCTCCAAAAT    |
| GAPDH reverse | GGCTGTTGTCATACTTCTCATGG  |
